# Supplementary material for: Fractionation and Extraction Optimization of Potentially Valuable Compounds and Their Profiling in Six Varieties of Two Nicotiana Species
Source: MDPI journal article supplement (doi:10.3390/molecules27228105), 2022-11-21
Supplement: s1 [file s1]

**Table S1.** Extraction method summary.

| Method No. | Extraction Solvents                                      | Base Extraction Methods |
|------------|----------------------------------------------------------|-------------------------|
| M1         | CH <sub>2</sub> Cl <sub>2</sub>                          | BM1                     |
| M2         | CH <sub>2</sub> Cl <sub>2</sub>                          | BM2                     |
| M3         | CH <sub>2</sub> Cl <sub>2</sub> /MeOH (4:1, <i>v/v</i> ) | BM1                     |
| M4         | CH <sub>2</sub> Cl <sub>2</sub> /MeOH (4:1, <i>v/v</i> ) | BM2                     |
| M5         | CH <sub>2</sub> Cl <sub>2</sub> /MeOH (1:1, <i>v/v</i> ) | BM1                     |
| M6         | CH <sub>2</sub> Cl <sub>2</sub> /MeOH (1:1, <i>v/v</i> ) | BM2                     |
| M7         | CH <sub>2</sub> Cl <sub>2</sub> /MeOH (1:4, <i>v/v</i> ) | BM1                     |
| M8         | CH <sub>2</sub> Cl <sub>2</sub> /MeOH (1:4, <i>v/v</i> ) | BM2                     |
| M9         | MeOH                                                     | BM1                     |
| M10        | MeOH                                                     | BM2                     |
| M11        | MeOH/H <sub>2</sub> O (9:1, <i>v/v</i> )                 | BM1                     |
| M12        | MeOH/H <sub>2</sub> O (9:1, <i>v/v</i> )                 | BM2                     |
| M13        | MeOH/H <sub>2</sub> O (7:3, <i>v/v</i> )                 | BM3                     |

**Table S2.** List of analytes and internal standards, and their selected properties: ESI polarity, monoisotopic mass (*m/z*), and retention time (RT).

| No. | Compounds                                    | ESI | <i>m/z</i> | RT   |
|-----|----------------------------------------------|-----|------------|------|
| 1   | Nicotine                                     | Pos | 163.12297  | 4.60 |
| 2   | Nicotine- <i>d4</i>                          | Pos | 167.14809  | 4.60 |
| 3   | Anatabine                                    | Pos | 161.10732  | 3.96 |
| 4   | Anatabine- <i>d4</i>                         | Pos | 165.13244  | 3.96 |
| 5   | Anabasine                                    | Pos | 163.12297  | 3.70 |
| 6   | Anabasine- <i>d4</i>                         | Pos | 167.14809  | 3.70 |
| 7   | Myosmine                                     | Pos | 147.09167  | 4.38 |
| 8   | Myosmine- <i>d4</i>                          | Pos | 151.11679  | 4.37 |
| 9   | Nicotinamide                                 | Pos | 123.05529  | 2.60 |
| 10  | Nicotinamide- <sup>13</sup> C <sub>6</sub>   | Pos | 129.07542  | 2.60 |
| 11  | Cotinine                                     | Pos | 177.10224  | 3.58 |
| 12  | Cotinine- <i>d3</i>                          | Pos | 180.12107  | 3.58 |
| 13  | Nornicotine                                  | Pos | 149.10732  | 3.24 |
| 14  | Nornicotine- <i>d4</i>                       | Pos | 153.13244  | 3.23 |
| 15  | Norcotinine                                  | Pos | 163.08659  | 3.35 |
| 16  | Norcotinine- <sup>13</sup> C <sub>3</sub>    | Pos | 166.09666  | 3.35 |
| 17  | Nicotinic acid                               | Pos | 124.03931  | 1.63 |
| 18  | Nicotinic acid- <sup>13</sup> C <sub>6</sub> | Pos | 130.05943  | 1.63 |
| 19  | Chlorogenic acid                             | Pos | 355.10236  | 4.42 |
| 20  | Cryptochlorogenic acid                       | Pos | 355.10236  | 4.63 |
| 21  | Neochlorogenic acid                          | Pos | 355.10236  | 2.63 |
| 22  | <i>cis</i> -Zeatin                           | Pos | 220.11929  | 1.38 |
| 23  | <i>trans</i> -Zeatin                         | Pos | 220.11929  | 1.64 |
| 24  | <i>trans</i> -Zeatin- <i>d5</i>              | Pos | 225.15067  | 1.62 |
| 25  | Ferulic acid                                 | Pos | 195.06519  | 5.48 |
| 26  | Isoferulic acid                              | Pos | 195.06519  | 5.38 |
| 27  | Rutin                                        | Pos | 611.16066  | 5.31 |
| 28  | Rutin- <i>d3</i>                             | Pos | 614.17949  | 5.31 |
| 29  | Xylitol                                      | Neg | 151.06120  | 2.50 |
| 30  | Xylitol- <i>d7</i>                           | Neg | 158.10513  | 2.50 |
| 31  | Ambroxide                                    | Pos | 237.22129  | 3.50 |
| 32  | Linoleic acid                                | Pos | 281.24751  | 4.55 |
| 33  | Linoleic acid- <sup>13</sup> C <sub>18</sub> | Pos | 299.30789  | 4.58 |
| 34  | $\alpha$ -Tocopherol                         | Pos | 431.38836  | 7.50 |
| 35  | $\alpha$ -Tocopherol- <i>d6</i>              | Pos | 437.42602  | 7.50 |
| 36  | Vitamin D <sub>3</sub>                       | Pos | 385.34649  | 6.70 |
| 37  | Vitamin D <sub>3</sub> - <i>d3</i>           | Pos | 388.36532  | 6.70 |
